# Supplementary material for: Copper complexes of arylselenolate-based ligands: synthesis and catalytic activity in azide–alkyne cycloaddition reactions
Source: Royal Society of Chemistry journal article supplement (doi:10.1039/c8nj04602f), 2019-01-01
Supplement: c8nj04602f1.pdf [file c8nj04602f1.pdf]

## Supporting Information

### **Copper Complexes of Arylselenolate based Ligands: Synthesis and Catalytic Activity in Azide-Alkyne Cycloaddition Reactions**

Rohit Singh Chauhan<sup>\*a</sup>, Dhvani Oza, Seema Yadav<sup>b</sup>, Chandrakanta Dash<sup>\*b</sup>, Alexandra M. Z. Slawin<sup>c</sup>, Neelam Shivran<sup>d</sup>

<sup>a</sup>Department of Chemistry, K. J. Somaiya College of Science and Commerce, Mumbai- 400 078,

Email: [rohit.chauhan@somaiya.edu](mailto:rohit.chauhan@somaiya.edu)

<sup>b</sup>Department of Chemistry, Central University of Rajasthan, Ajmer-305817, Rajasthan,

Email: [ckdash@curaj.ac.in](mailto:ckdash@curaj.ac.in)

<sup>c</sup>EastCHEM School of Chemistry, University of St Andrews, St Andrews, Fife KY16 9ST

Email: [amzs@st-andrews.ac.uk](mailto:amzs@st-andrews.ac.uk)

<sup>d</sup>Department of Chemistry, Indian Institute of Science Education and Research, Pune-411008

CD-SY-910

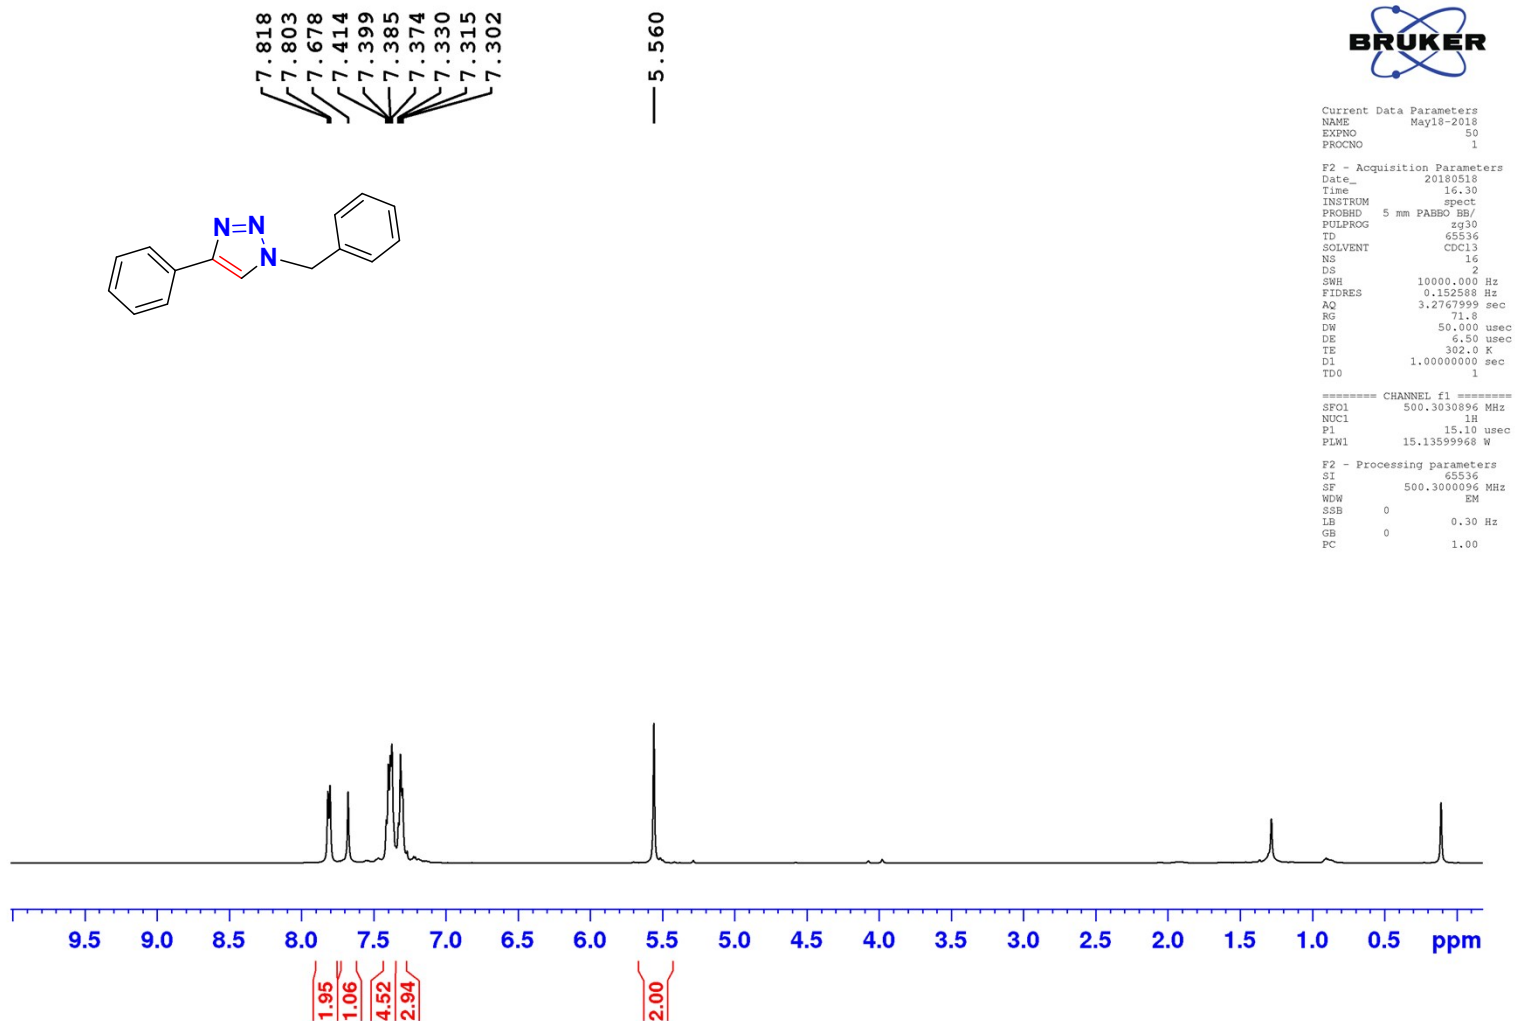

Figure S1. <sup>1</sup>H NMR spectrum of **3aa** in CDCl<sub>3</sub>

CD-SY-910

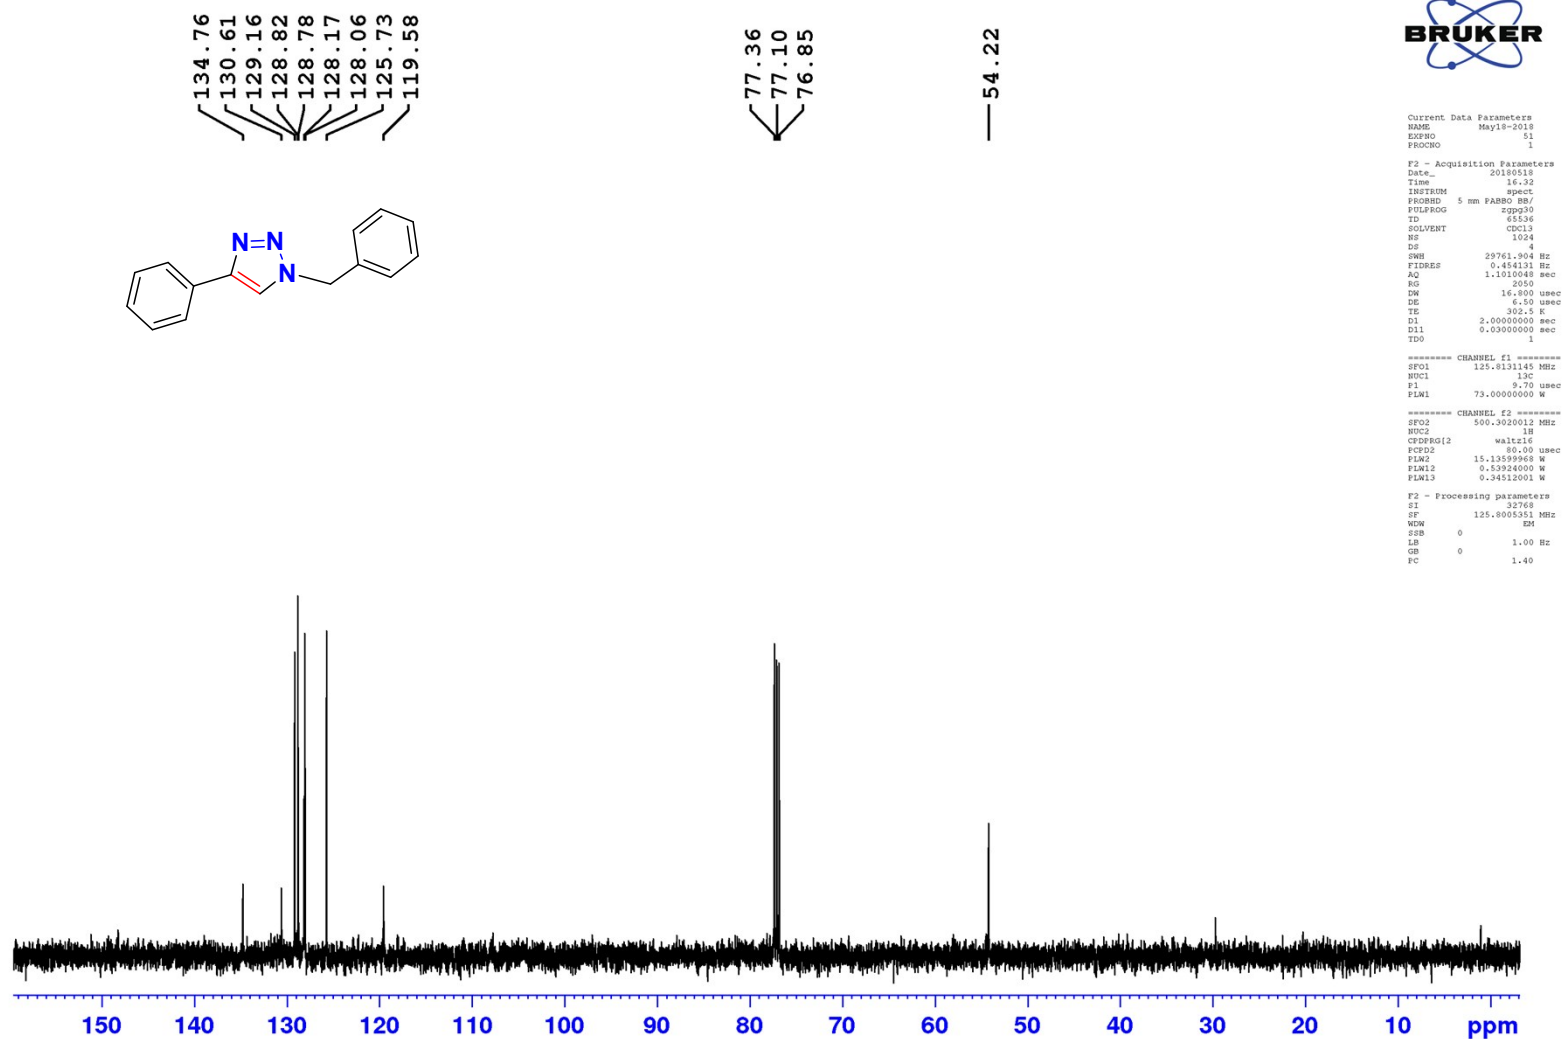

Figure S2.  $^{13}\text{C}\{^1\text{H}\}$  NMR spectrum of 3aa in  $\text{CDCl}_3$

CD-SY-915

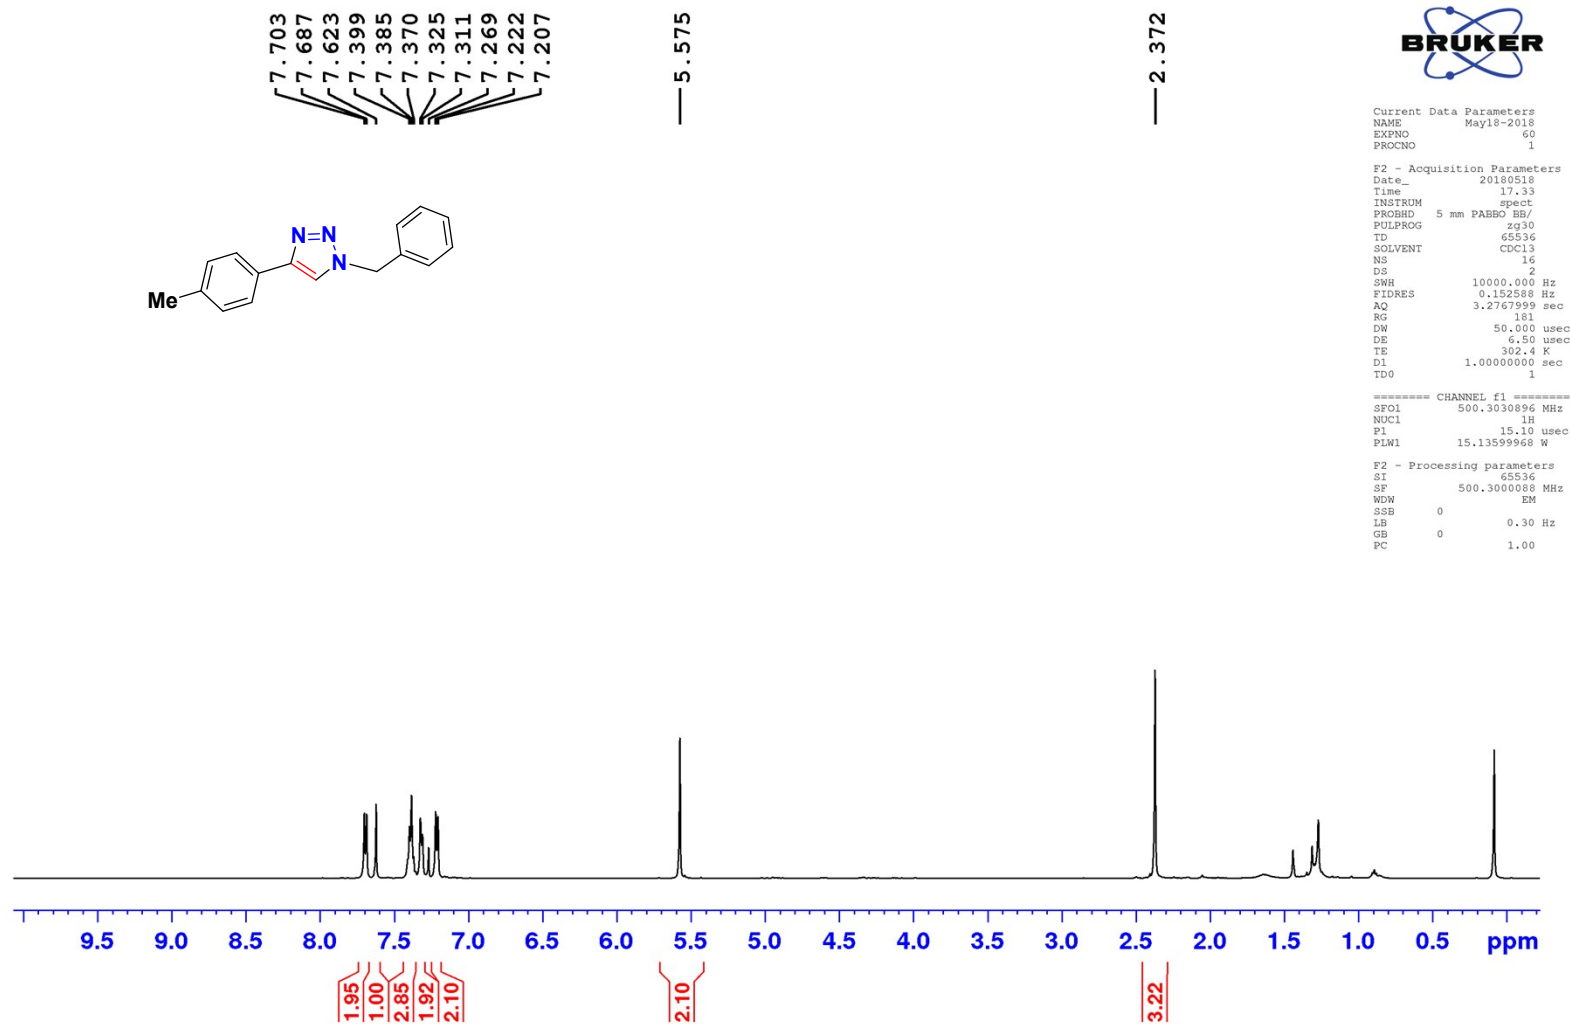

Figure S3. <sup>1</sup>H NMR spectrum of **3ab** in CDCl<sub>3</sub>

CD-SY-915  
21/05/2018

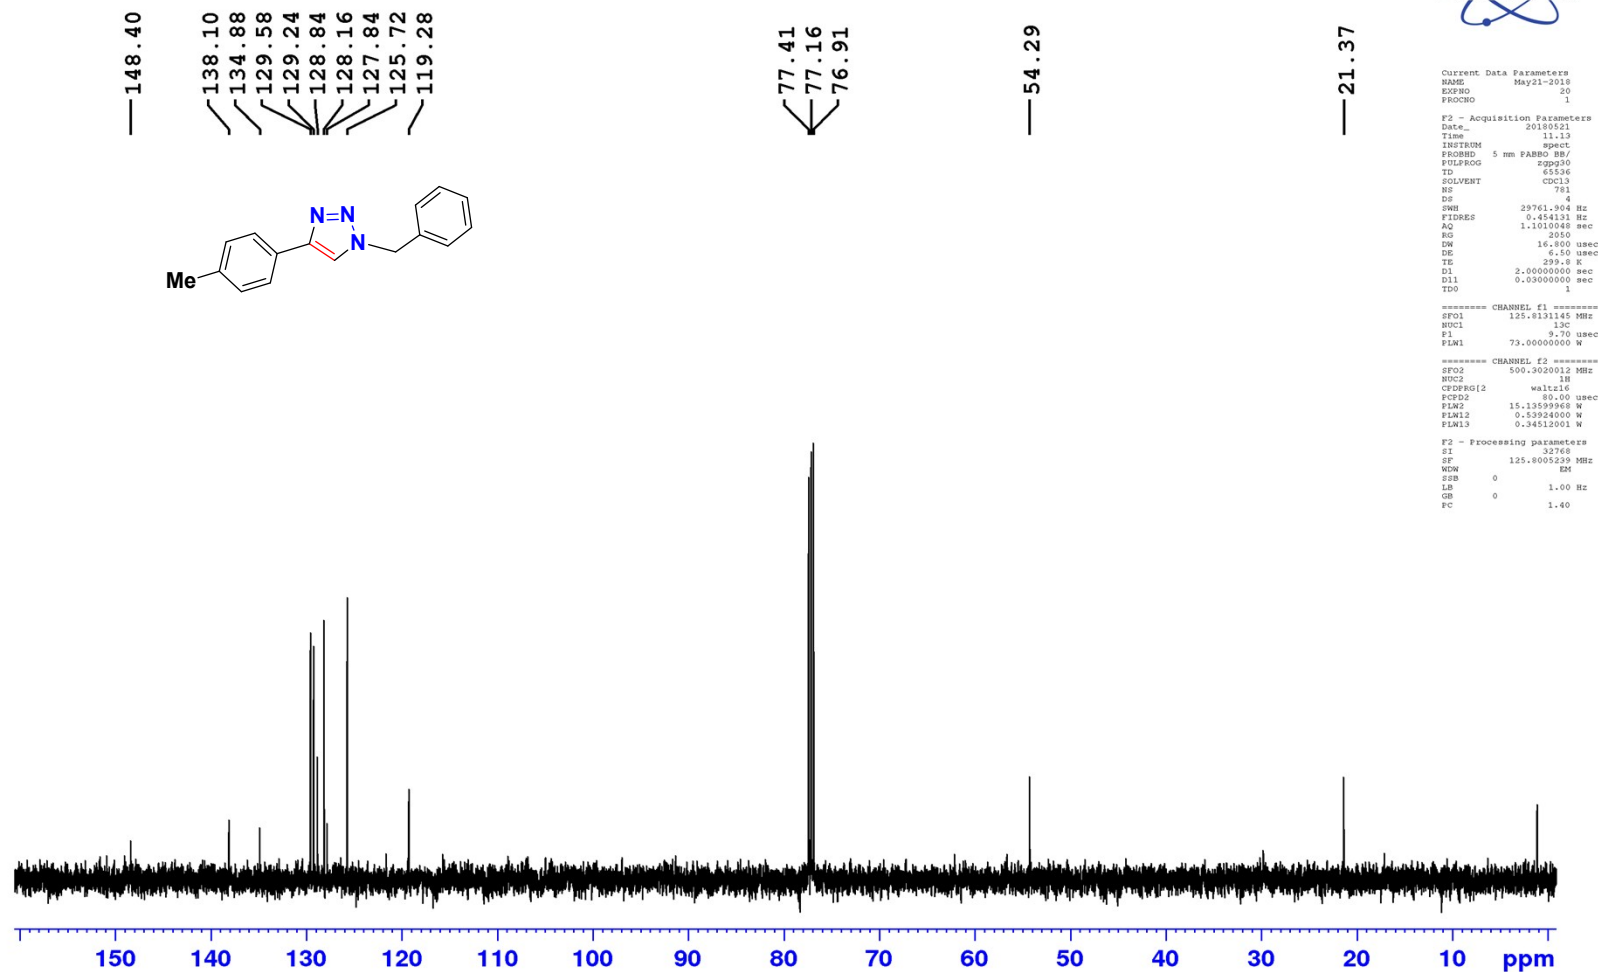

Figure S4.  $^{13}\text{C}\{^1\text{H}\}$  NMR spectrum of **3ab** in  $\text{CDCl}_3$

CD-SY-916  
21/5/2018

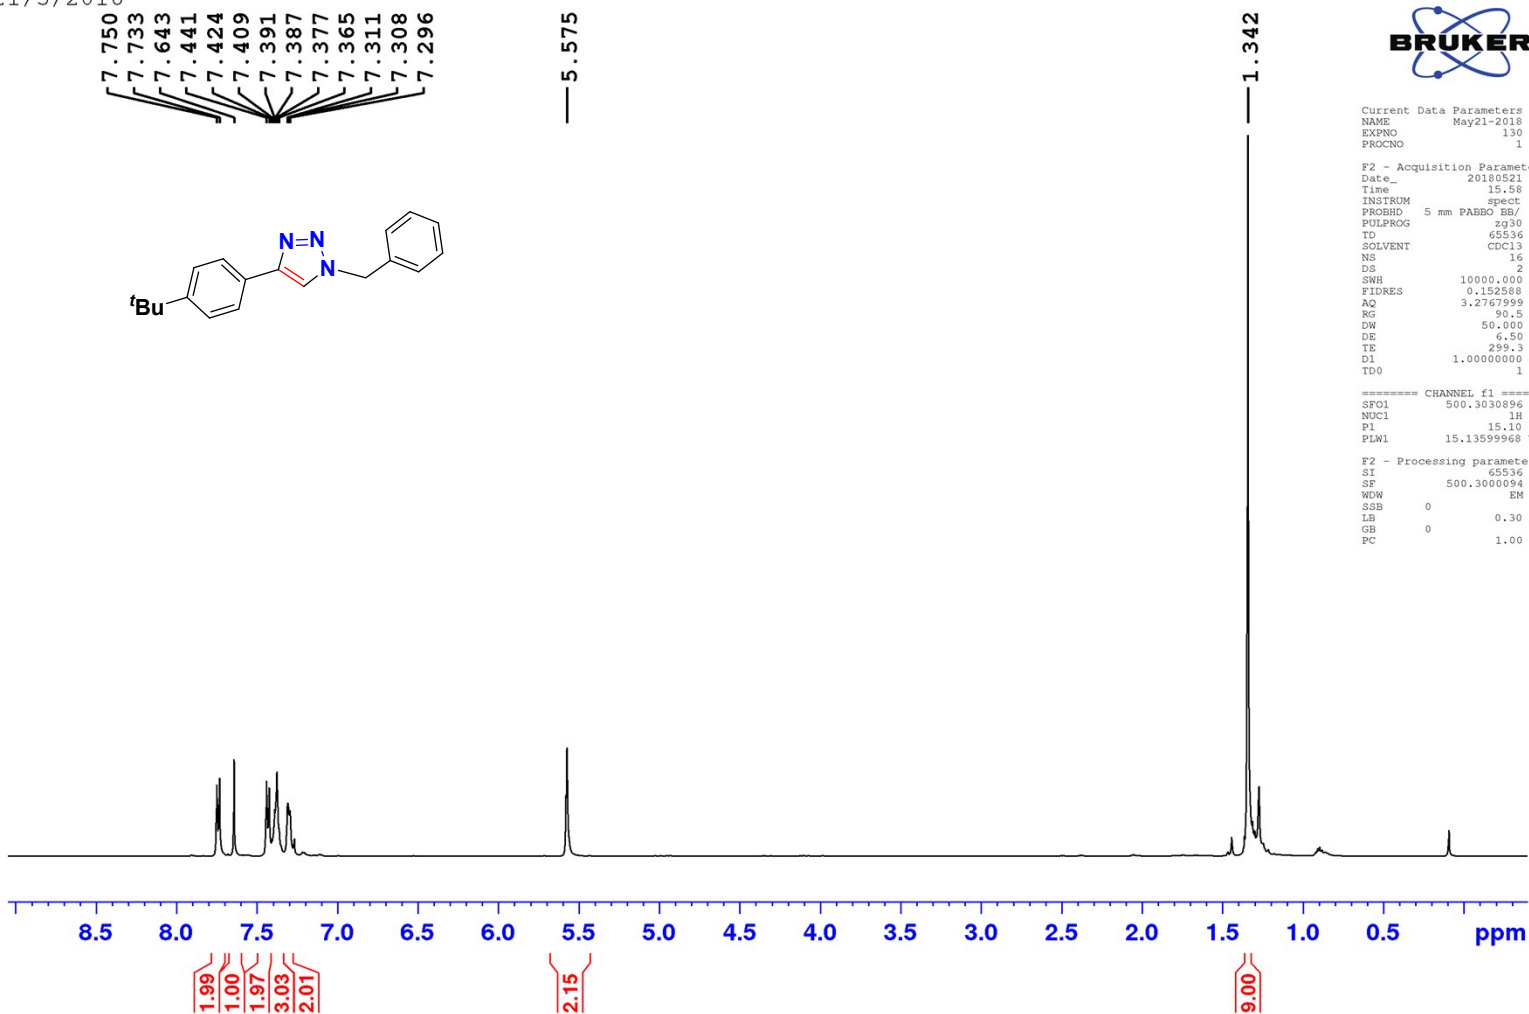

Figure S5.  $^1\text{H}$  NMR spectrum of **3ac** in  $\text{CDCl}_3$

CD-SY-916  
21/5/2018

— 151.40  
— 148.36  
134.95  
129.24  
128.83  
128.11  
127.87  
125.83  
125.57  
119.36

77.41  
77.16  
76.90

— 54.29

— 34.77  
— 31.40

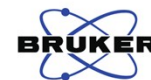

```
Current Data Parameters
NAME      May21-2018
EXPNO     131
PROCNO    1

F2 - Acquisition Parameters
Date_     20180521
Time      16.24
INSTRUM   spect
FQSBHD    5 mm PABBO BB7
PULPROG   Egpg30
TD         65536
SOLVENT   CDCl3
NS         624
DS         4
SWH        29761.904 Hz
FIDRES     0.454131 Hz
AQ         1.1502048 sec
RG         2050
SQ         16.800 usec
DE         6.50 usec
TE         300.0 K
D1         2.0000000 sec
D11        0.0300000 sec
TD0        1

===== CHANNEL f1 =====
SF01       125.8131145 MHz
NUC1        13C
P1          9.70 usec
PLM1       73.0000000 W

===== CHANNEL f2 =====
SF02       500.3020012 MHz
NUC2        1H
CPDPRG2    waltz16
PCPD2      80.00 usec
PLM2       15.13599968 W
PLM12      0.53924000 W
PLM13      0.34512001 W

F2 - Processing parameters
SI         32768
SF         125.8008217 MHz
WDW        EM
SSB        0
LB         1.00 Hz
GB         0
PC         1.40
```

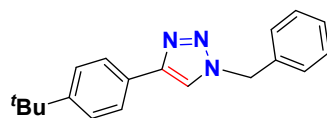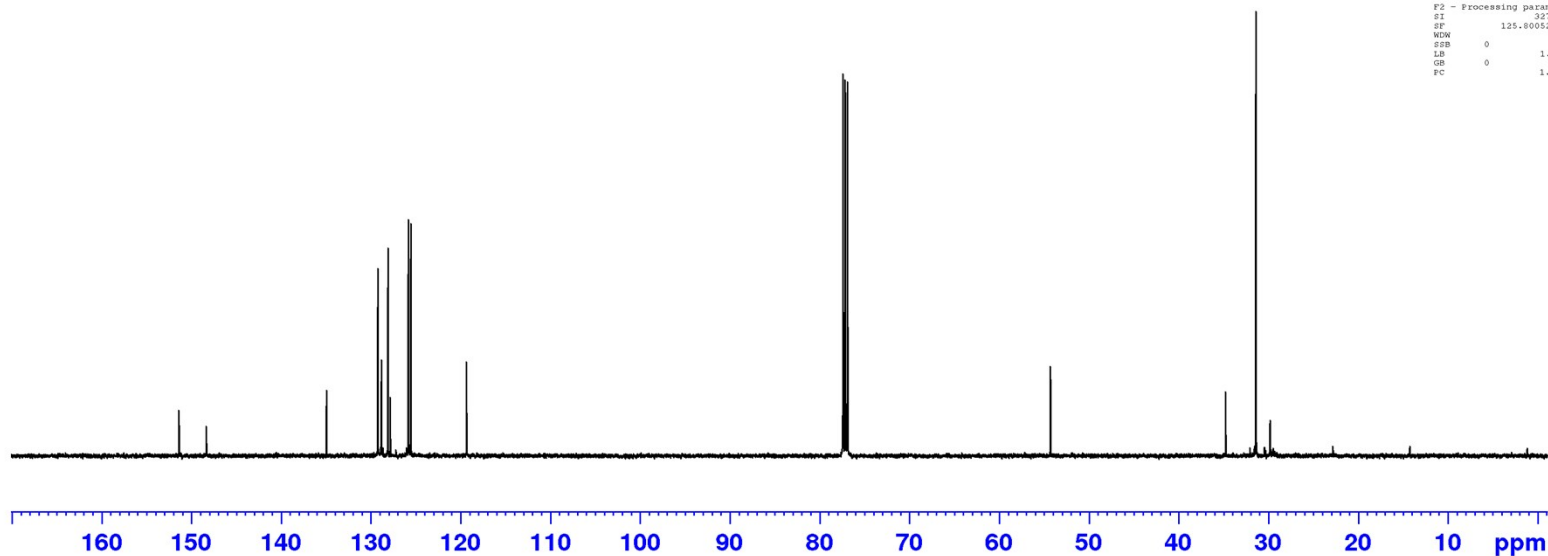

Figure S6.  $^{13}\text{C}\{^1\text{H}\}$  NMR spectrum of **3ac** in  $\text{CDCl}_3$

CD-SY-931  
21/5/2018

8.206  
7.936  
7.921  
7.817  
7.801  
7.575  
7.560  
7.545  
7.489  
7.474  
7.459  
7.397  
7.382  
7.368  
7.269

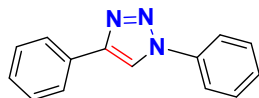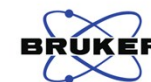

```
Current Data Parameters
NAME      May21-2018
EXPNO     100
PROCNO    1

F2 - Acquisition Parameters
Date_     20180521
Time      15.42
INSTRUM   spect
PROBHD    5 mm PABBO BB/
PULPROG   zg30
TD         65536
SOLVENT   CDCl3
NS         16
DS         2
SWH        10000.000 Hz
FIDRES     0.152588 Hz
AQ         3.2767999 sec
RG         181
DW         50.000 usec
DE         6.50 usec
TE         300.1 K
D1         1.0000000 sec
TD0        1

===== CHANNEL f1 =====
SFO1      500.3030896 MHz
NUC1      1H
P1        15.10 usec
PLW1      15.13599968 W

F2 - Processing parameters
SI         65536
SF         500.300091 MHz
WDW        EM
SSB        0
LB         0.30 Hz
GB         0
PC         1.00
```

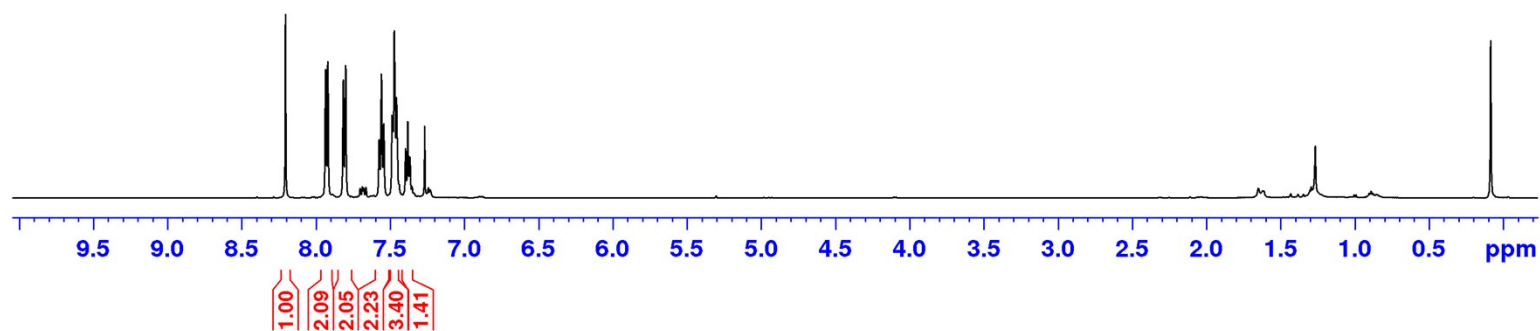

Figure S7. <sup>1</sup>H NMR spectrum of **3ad** in CDCl<sub>3</sub>



CD-SY-931  
22/5/2018

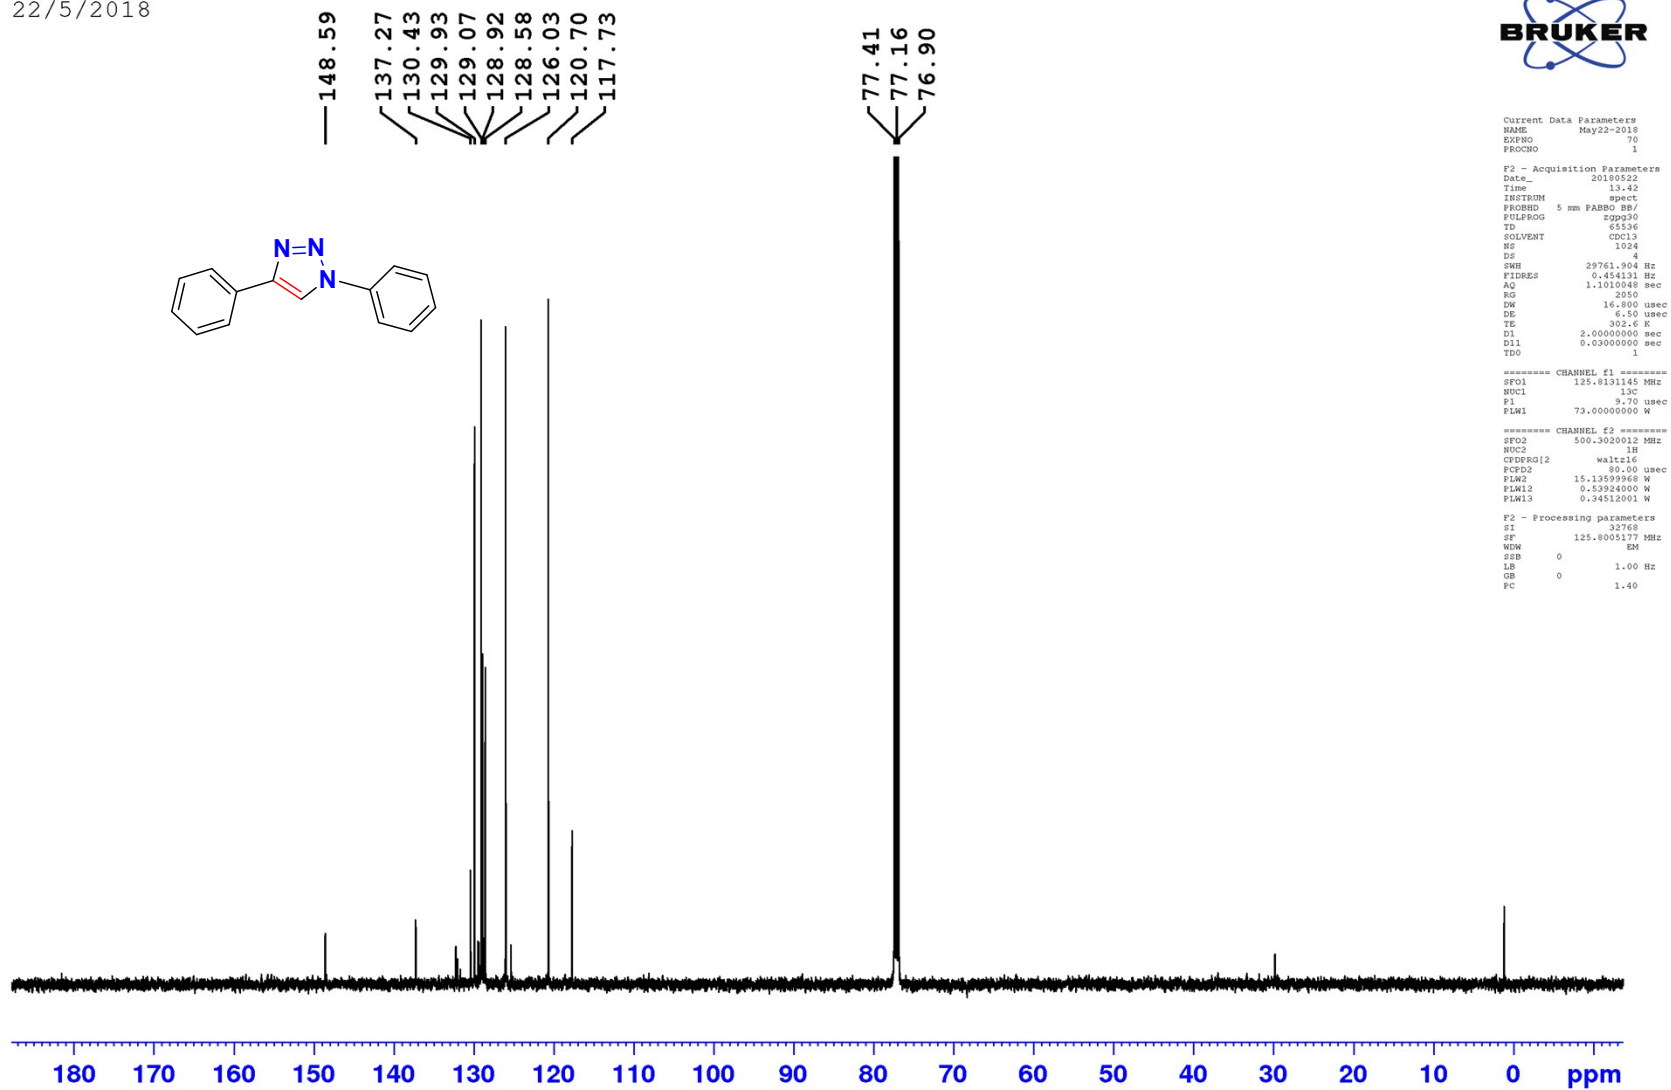

Figure S8.  $^{13}\text{C}\{^1\text{H}\}$  NMR spectrum of **3ad** in  $\text{CDCl}_3$

CD-SY-932  
21/5/2018

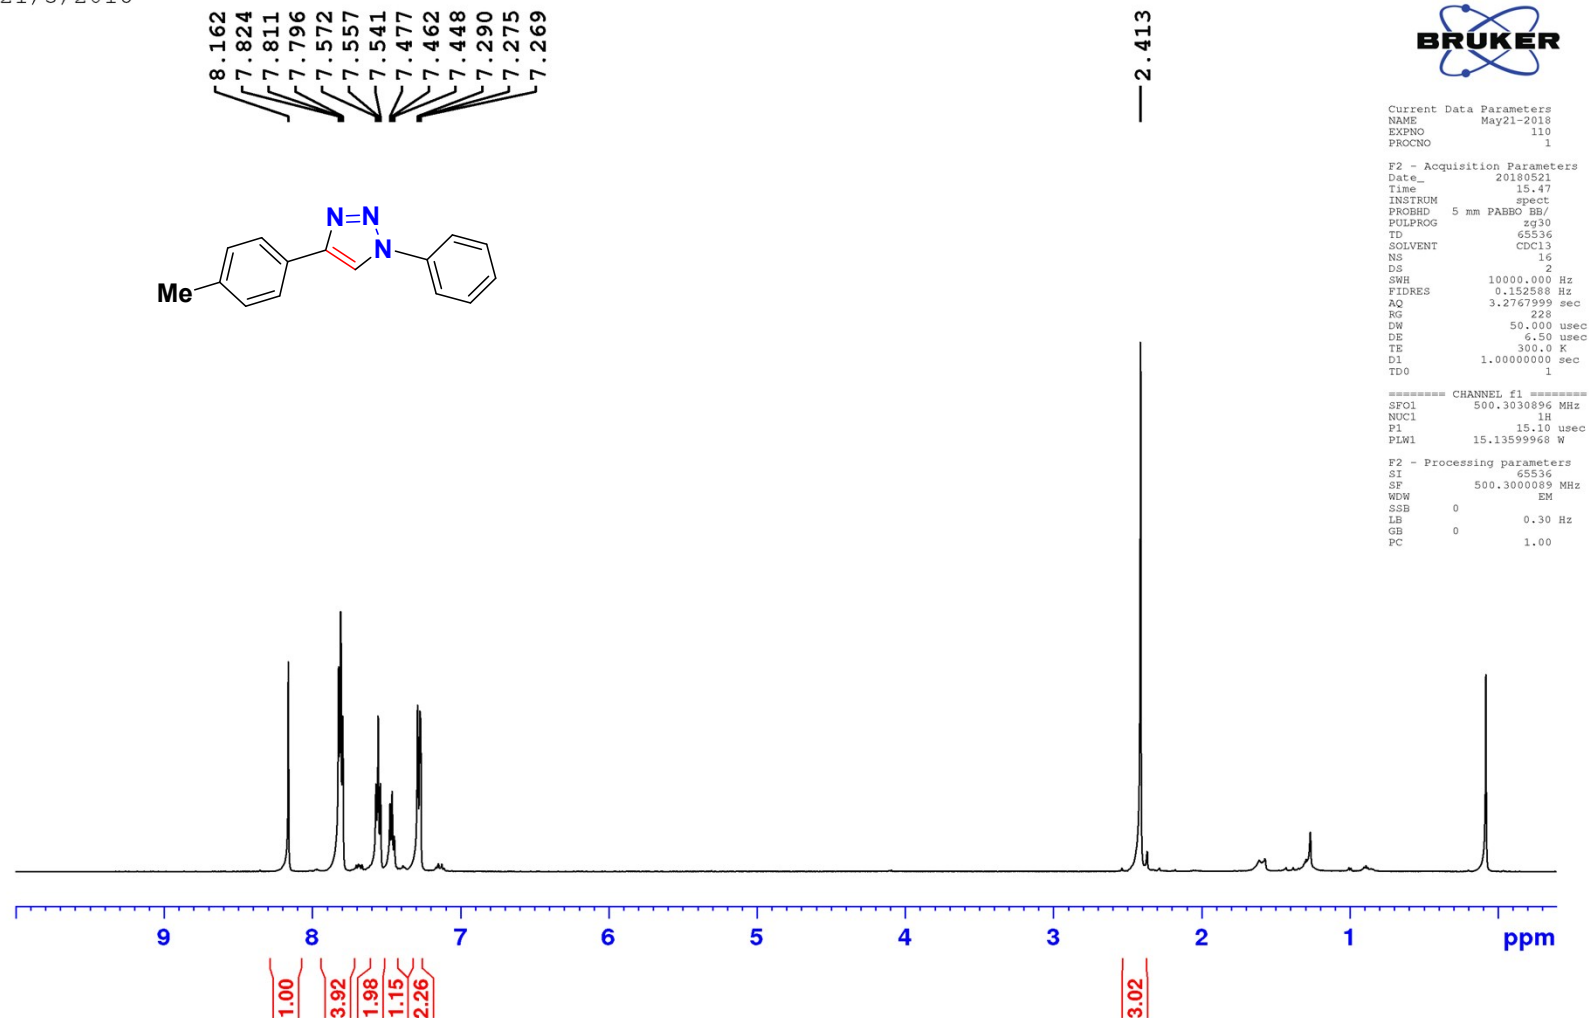

Figure S9. <sup>1</sup>H NMR spectrum of 3ae in CDCl<sub>3</sub>

CD-SY-932

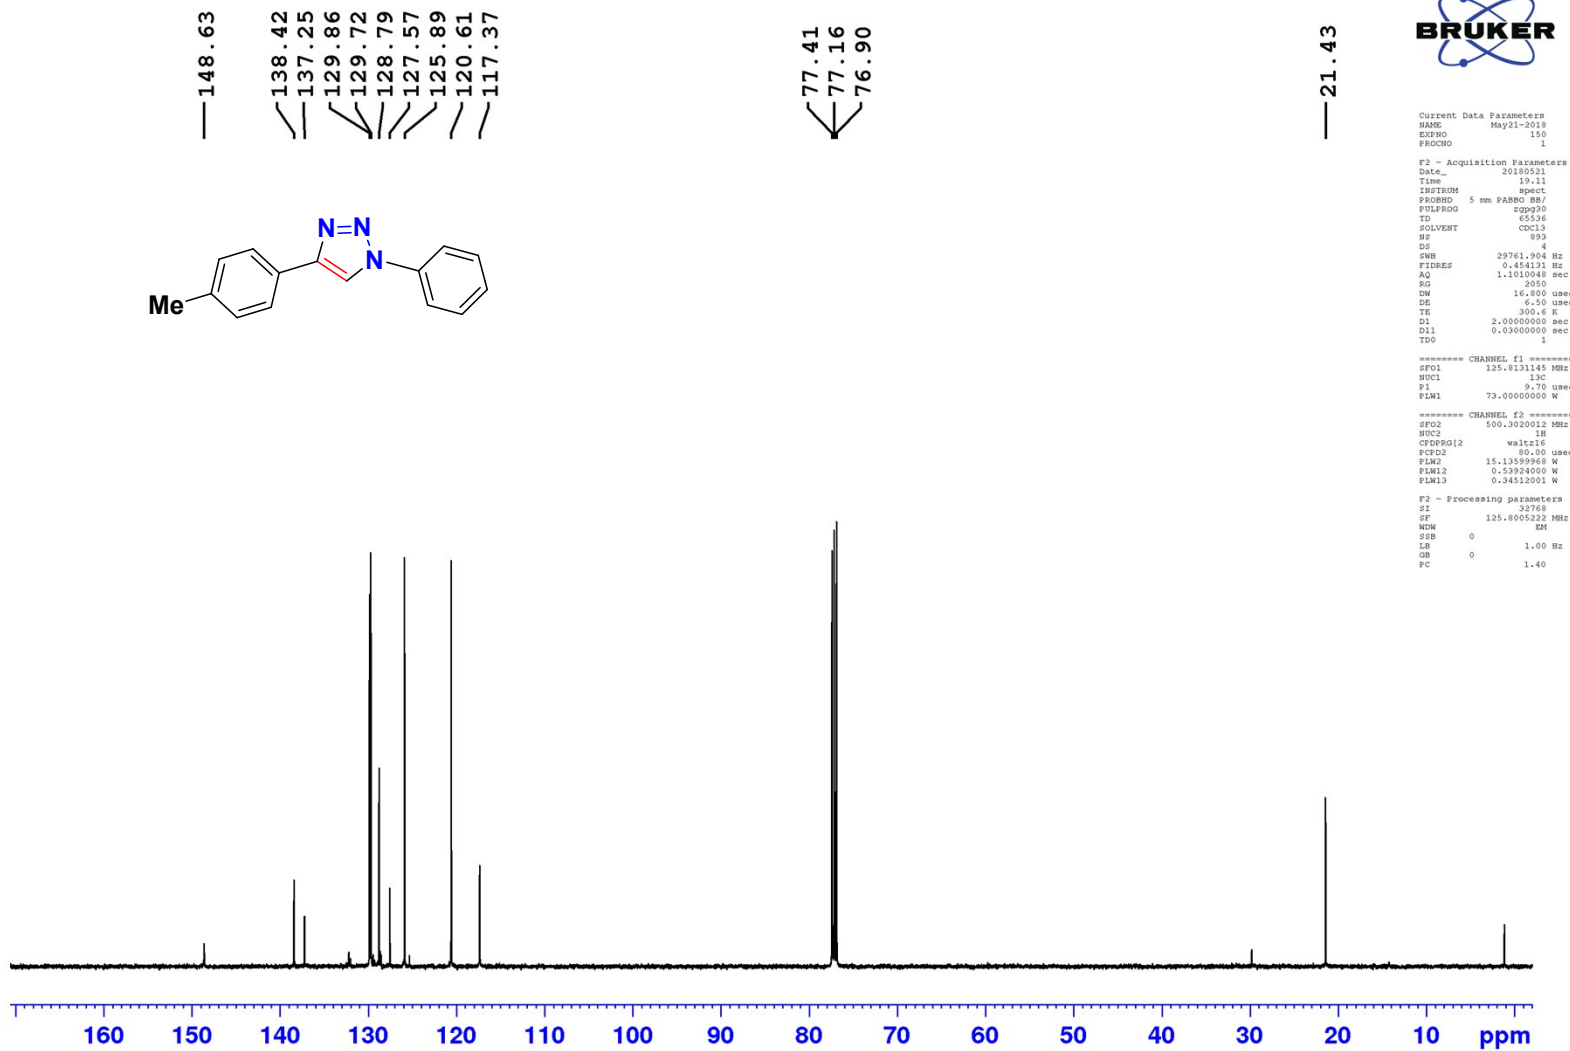

Figure S10.  $^{13}\text{C}\{^1\text{H}\}$  NMR spectrum of **3ae** in  $\text{CDCl}_3$

CD-SY-933  
21/5/2018

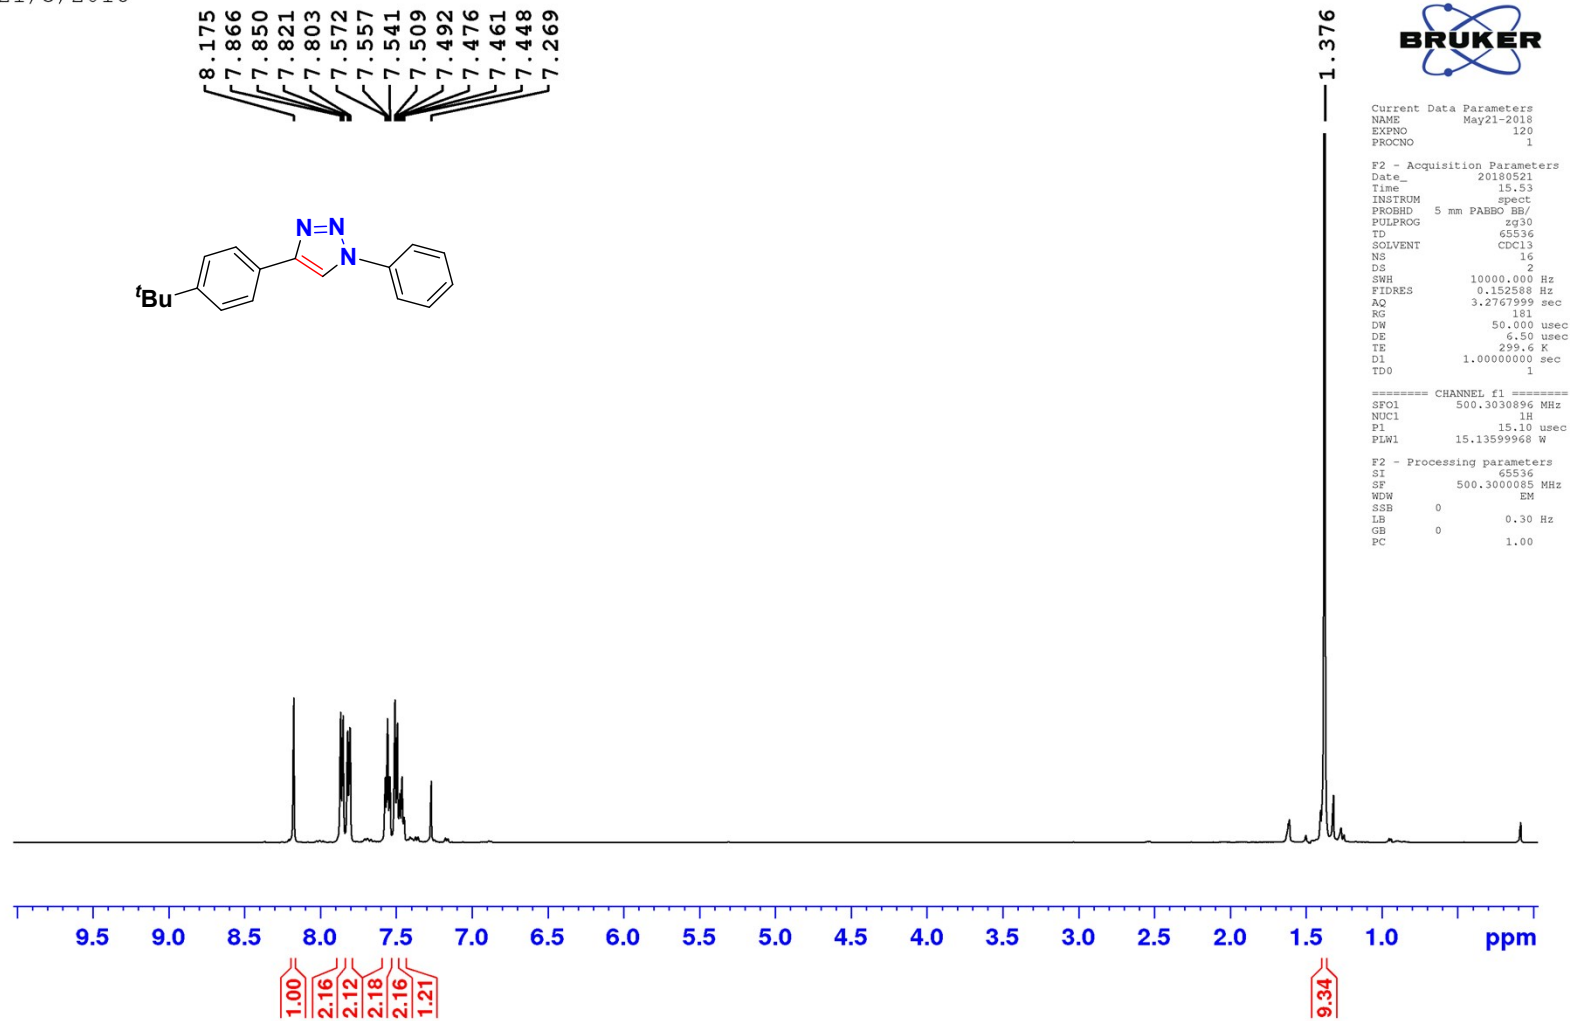

Figure S11. <sup>1</sup>HNMR spectrum of 3af in CDCl<sub>3</sub>

CD-SY-933

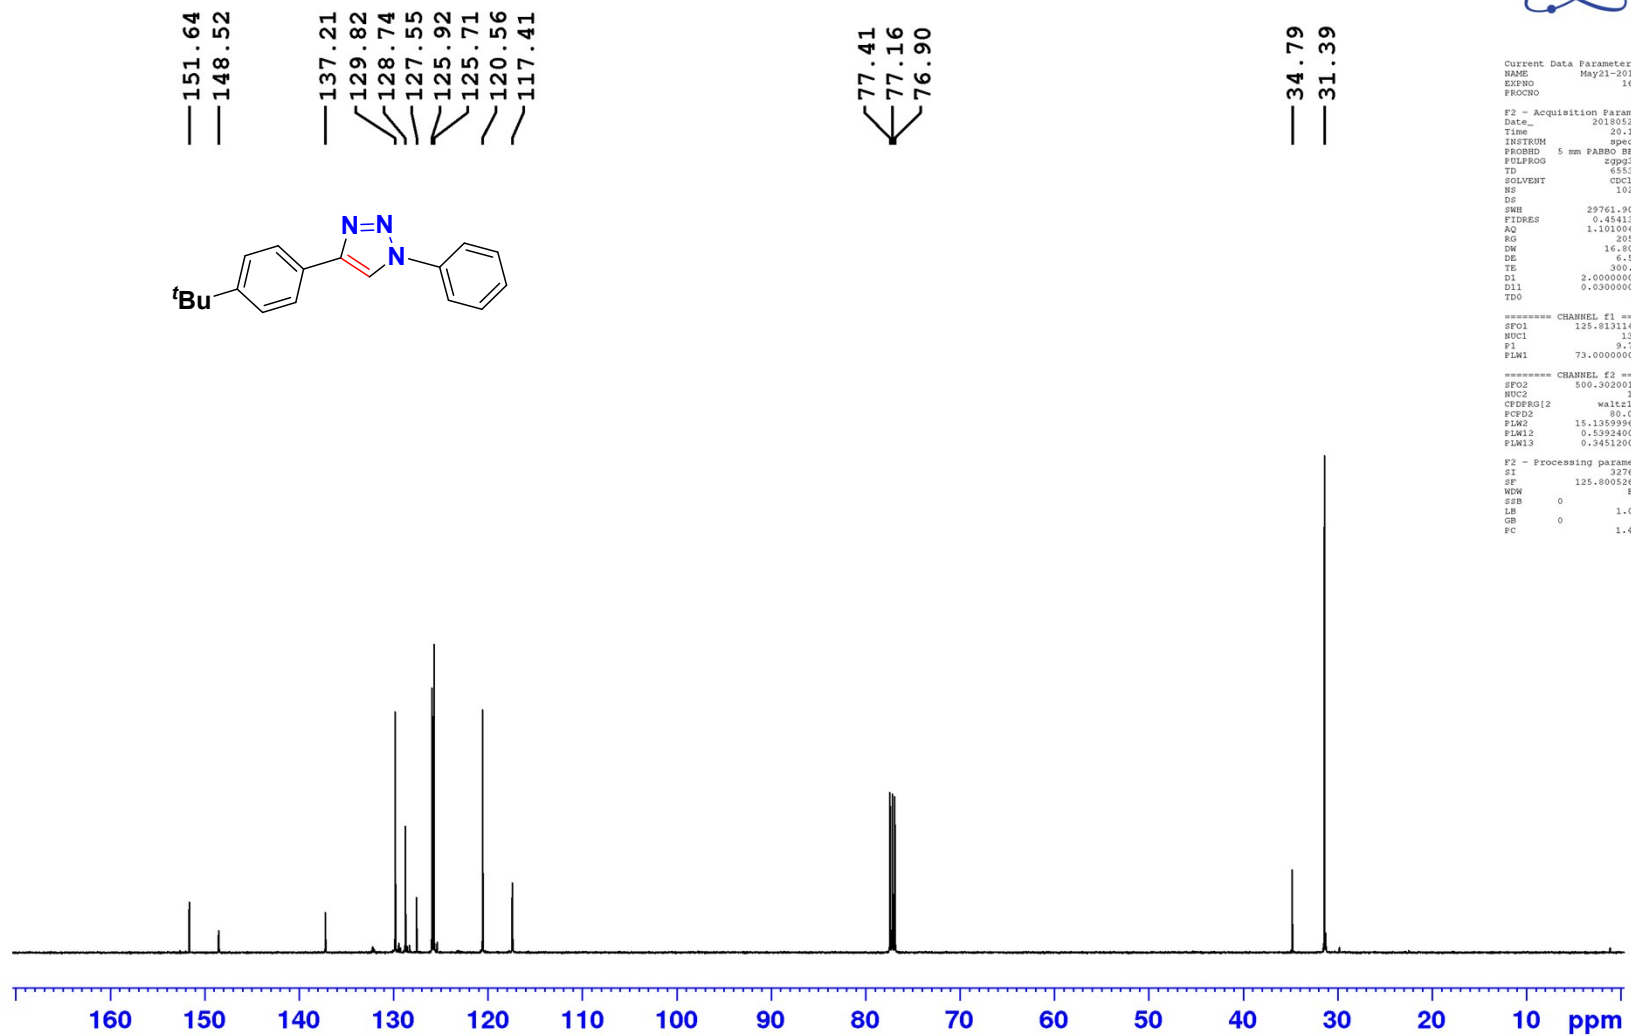

Figure S12.  $^{13}\text{C}\{^1\text{H}\}$  NMR spectrum of 3af in  $\text{CDCl}_3$

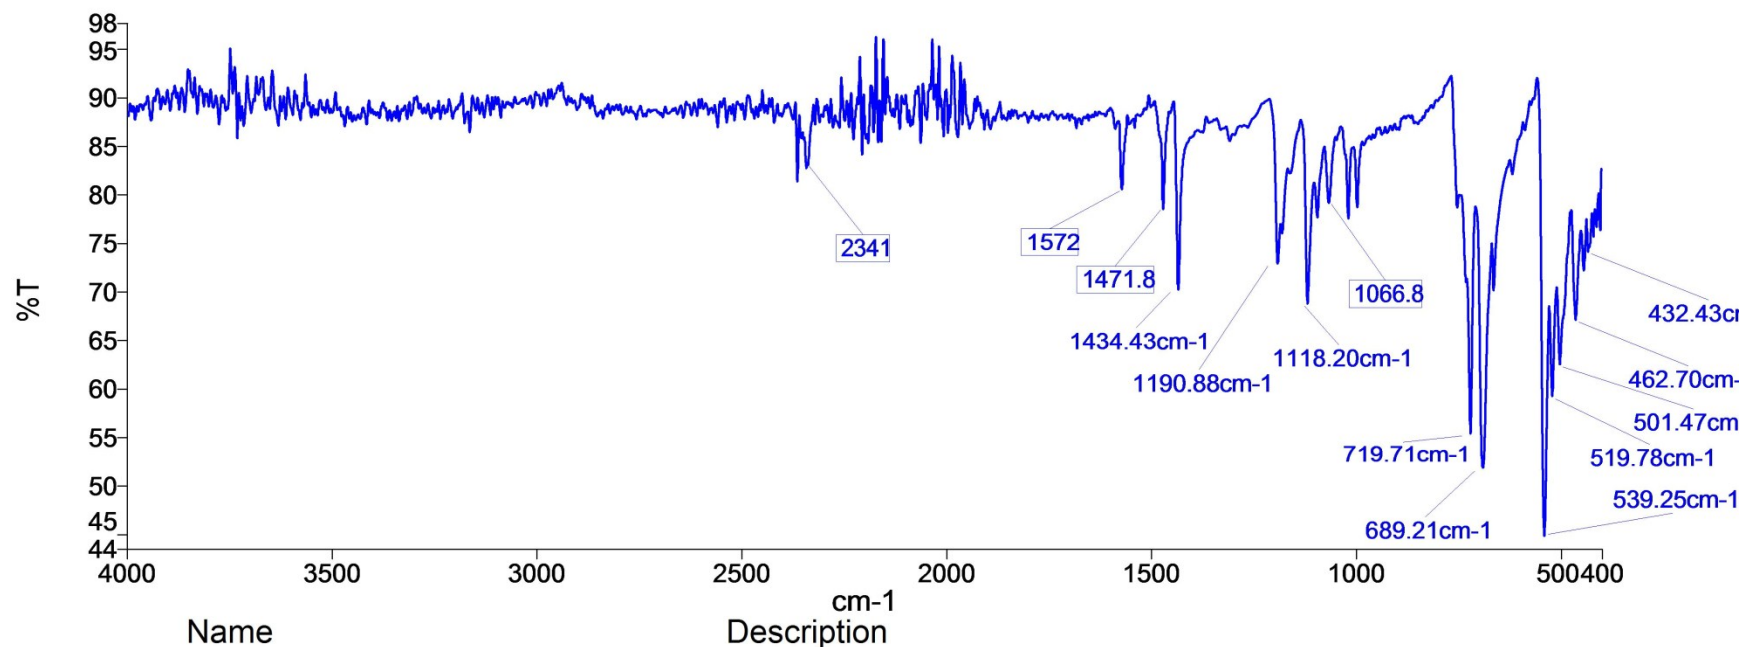

Name

Description

Rsc-15 Sample 725 By Administrator Date Wednesday, September 27 2017

**Figure S13.** IR spectrum of  $[\text{CuCl}(\text{SePh})(\text{PPh}_3)_2]$  (**1a**)

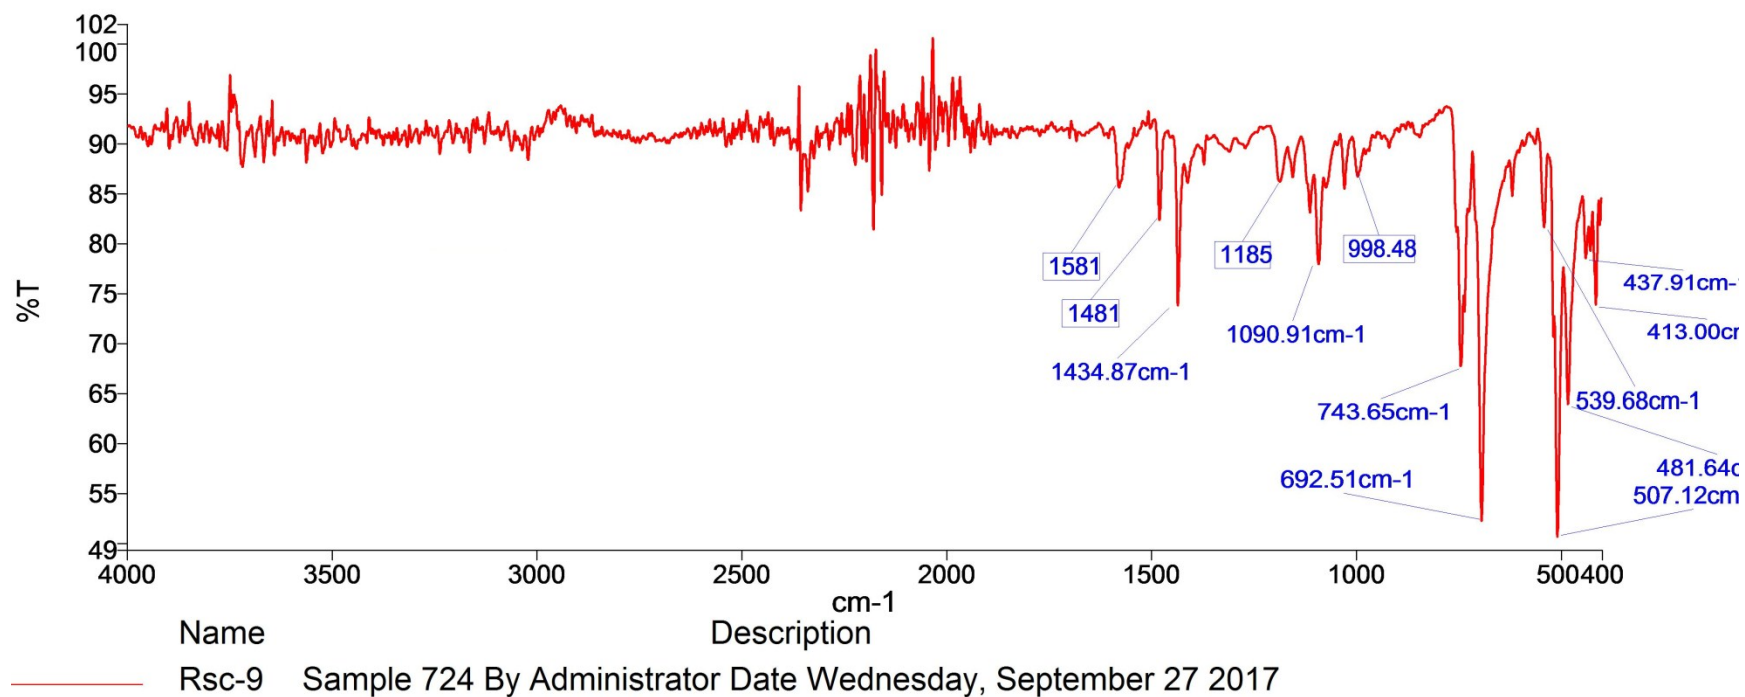

**Figure S14.** IR spectrum of  $[\text{CuCl}(\text{SeC}_5\text{H}_4\text{N})(\text{PPh}_3)_2]$  (**1b**)

Spectrum

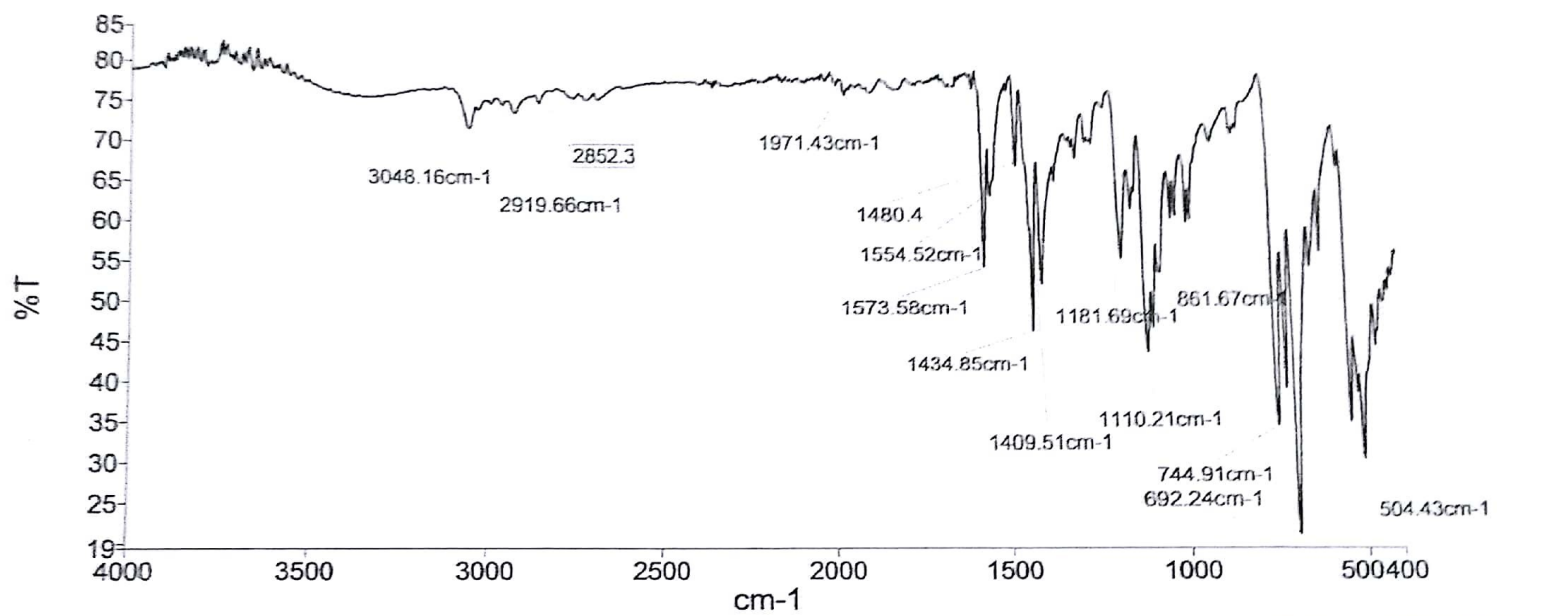

Figure S15. IR spectrum of  $[\text{CuCl}(\text{SeC}_5\text{H}_4\text{N}^+\text{H})(\text{PPh}_3)_2]$  ( $1b'$ )



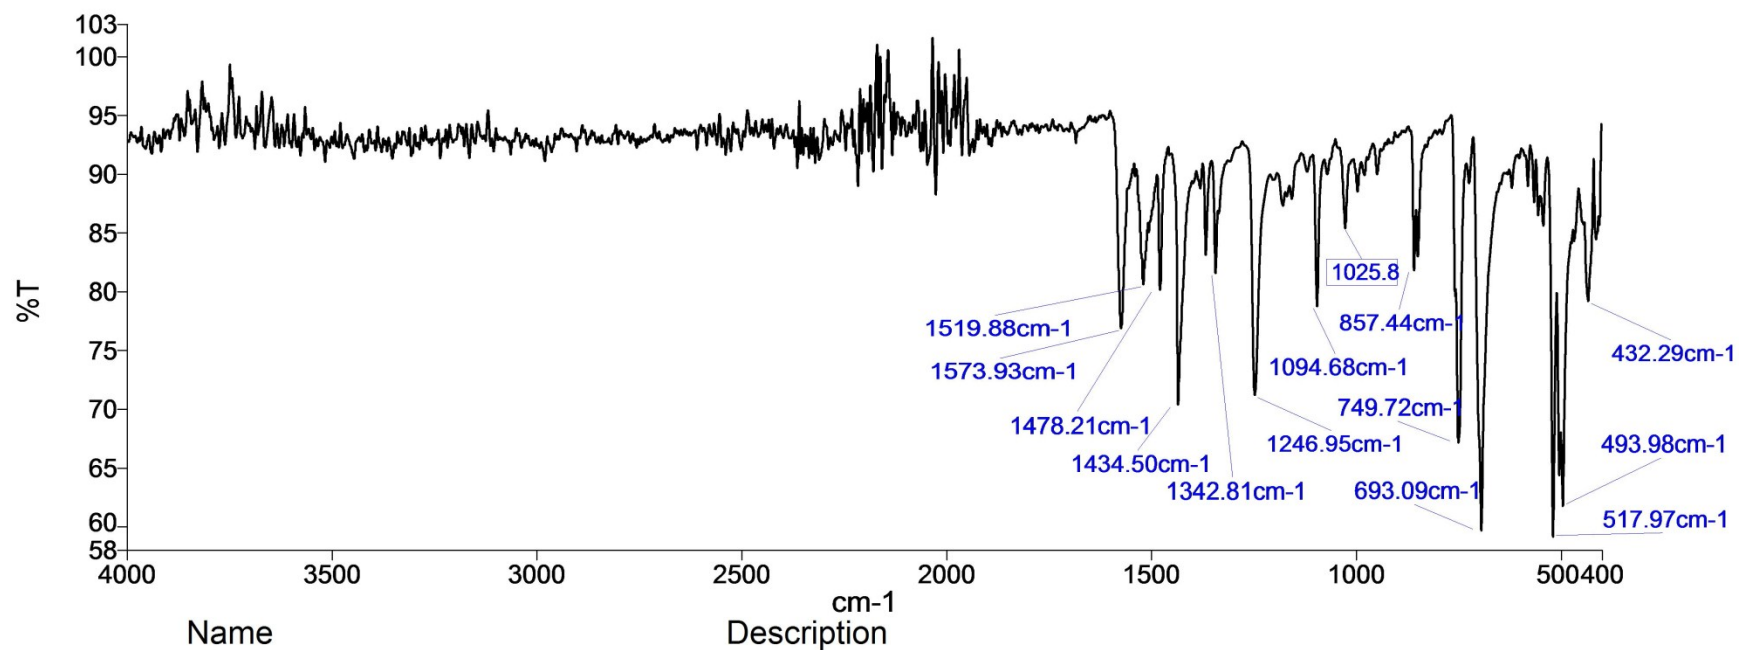

Name

Description

Rsc-10 Sample 723 By Administrator Date Wednesday, September 27 2017

**Figure S16.** IR spectrum of  $[\text{CuCl}\{2\text{-SeC}_4\text{H}(4, 6\text{-Me})_2\text{N}_2\}(\text{PPh}_3)_2]$  (**1c**)

Spectrum

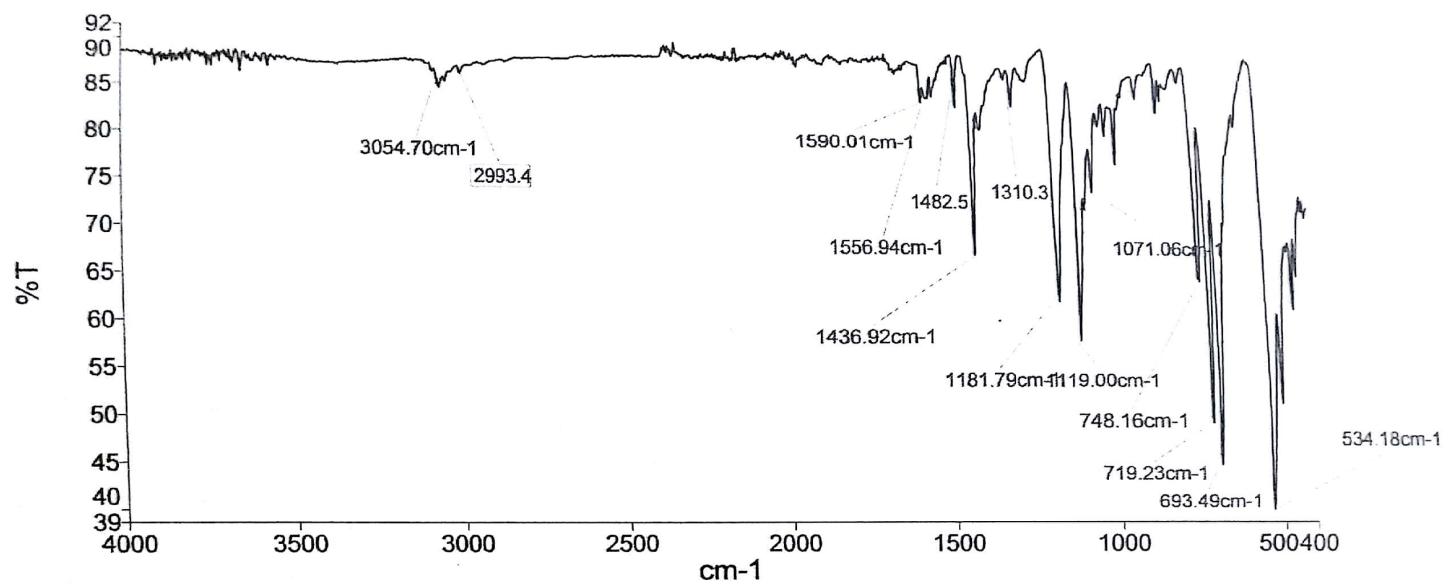

Figure S17. IR spectrum of  $[\text{CuCl}\{2\text{-SeC}_4\text{H}(4,6\text{-Me})_2\text{N}_2\text{H}\}(\text{PPh}_3)_2]$  (1C')

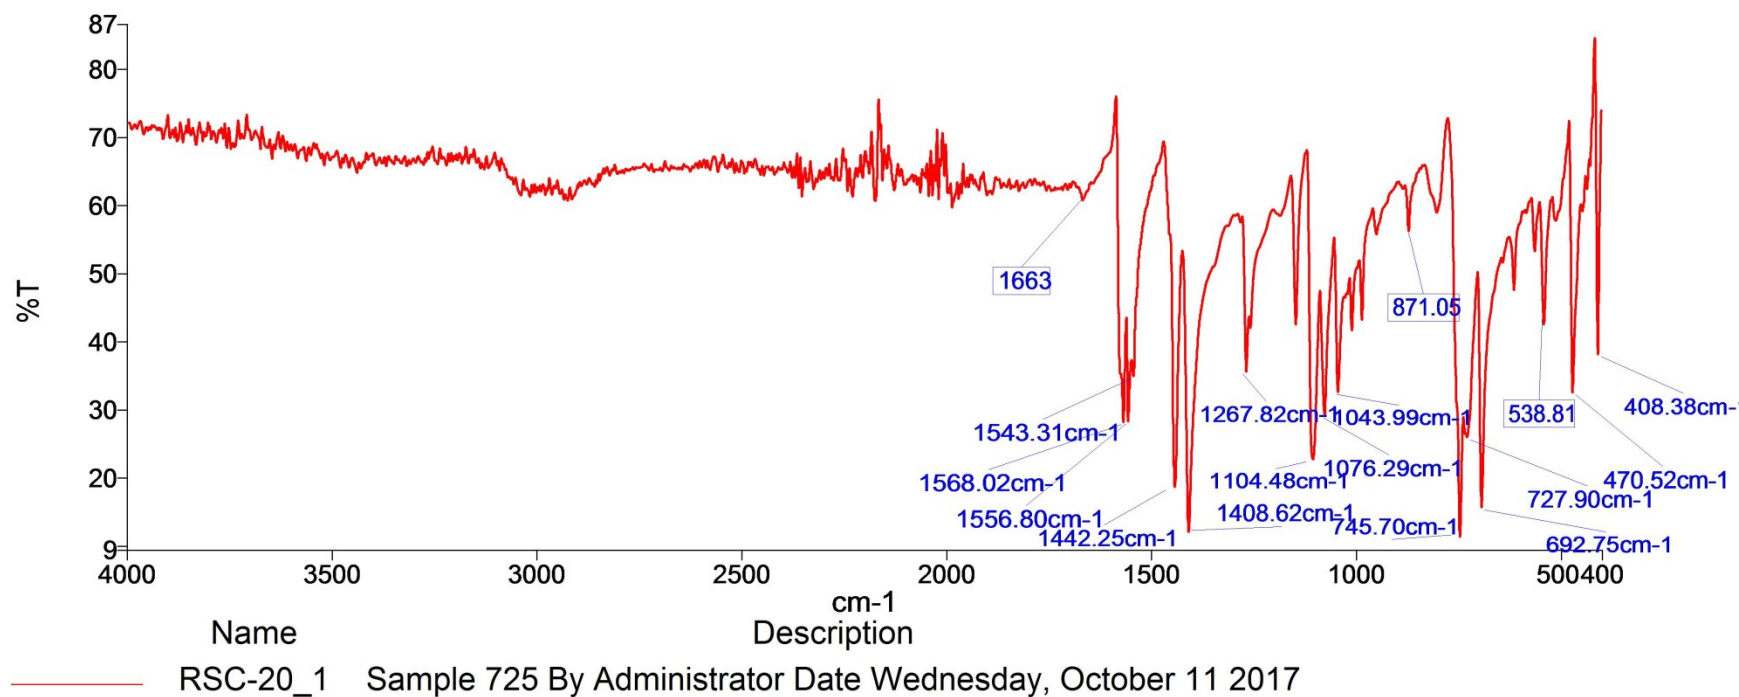

**Figure S18.** IR spectrum of  $[\text{Cu}(\text{SeC}_5\text{H}_4\text{N})_2]_n$  (**2b**)
